# Supplementary material
Source: MDPI journal article supplement (https://www.mdpi.com/1424-8247/15/10/1260)

[illegible]

|                                            |            |            |            |                 |            |            |            |            |                 |            |                          |                                   |
|--------------------------------------------|------------|------------|------------|-----------------|------------|------------|------------|------------|-----------------|------------|--------------------------|-----------------------------------|
| Log <i>k<sub>p</sub></i> (skin permeation) | -5.47 cm/s | -7.05 cm/s | -5.71 cm/s | -5.76 cm/s      | -5.53 cm/s | -5.73 cm/s | -5.72 cm/s | -6.07 cm/s | -6.30 cm/s      | -7.22 cm/s | -6.23 cm/s               | -6.63 cm/s                        |
| Lipinski                                   | Yes        | Yes        | Yes        | Yes             | Yes        | Yes        | Yes        | Yes        | Yes             | Yes        | Yes                      | Yes (1 violation: MW>500)         |
| Ghose                                      | Yes        | Yes        | Yes        | Yes             | Yes        | Yes        | Yes        | Yes        | Yes             | Yes        | No (1 violation: MR>130) | No (2 violations: MW>480, MR>130) |
| Veber                                      | Yes        | Yes        | Yes        | Yes             | Yes        | Yes        | Yes        | Yes        | Yes             | Yes        | Yes                      | No (1 violation: TPSA>140)        |
| Egan                                       | Yes        | Yes        | Yes        | Yes             | Yes        | Yes        | Yes        | Yes        | Yes             | Yes        | Yes                      | No (1 violation: TPSA>131.6)      |
| Muegge                                     | Yes        | Yes        | Yes        | Yes             | Yes        | Yes        | Yes        | Yes        | Yes             | Yes        | Yes                      | Yes                               |
| Bioavailability score                      | 0.55       | 0.55       | 0.55       | 0.55            | 0.55       | 0.55       | 0.55       | 0.55       | 0.55            | 0.55       | 0.55                     | 0.55                              |
| PAINS alert                                | 0          | 0          | 0          | 1 (anil_no_alk) | 0          | 0          | 0          | 0          | 1 (anil_no_alk) | 0          | 0                        | 0                                 |
| Synthetic accessibility                    | 2.02       | 2.84       | 2.33       | 2.09            | 2.25       | 2.08       | 1.89       | 2.16       | 2.19            | 2.48       | 2.85                     | 3.42                              |

**Figure S1.** IC<sub>50</sub> curve of compound (5) against HDAC-1.

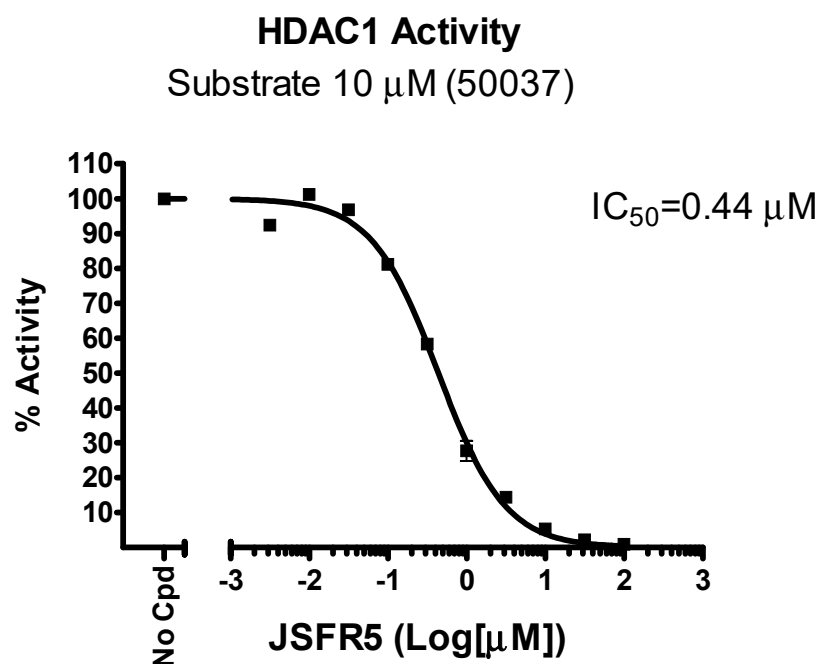

**Figure S2.** IC<sub>50</sub> curve of compound (5) against HDAC-2

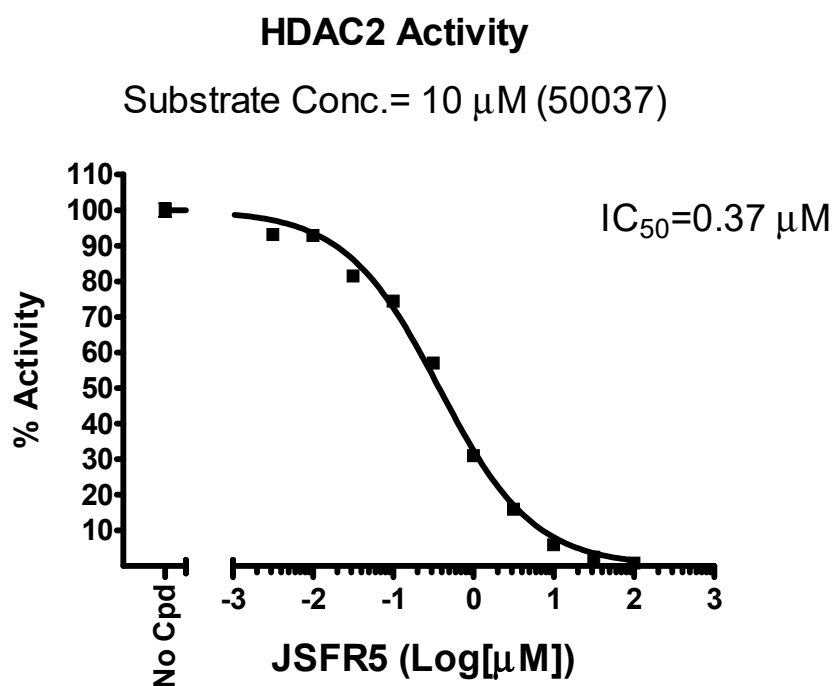

**Figure S3.** Pose of RVT in the active site of HDAC-1 (map of electrostatic potential – minimum -0.3 and maximum +0.3).

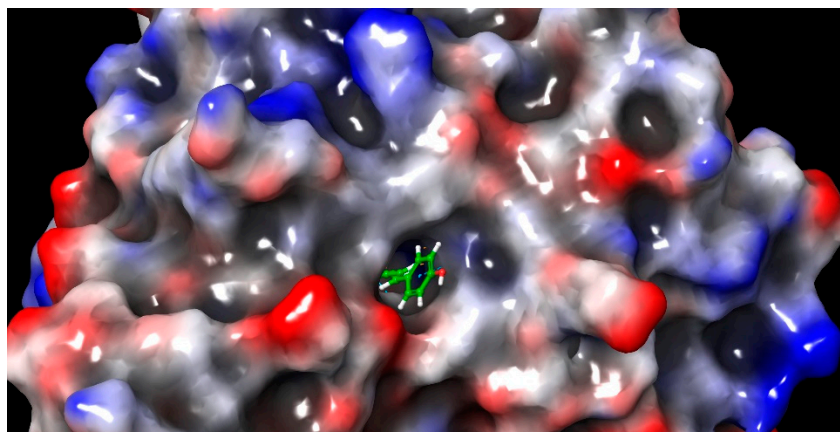

**Figure S4.** Pose of RVT in the active site of HDAC-2 (map of electrostatic potential – minimum -0.3 and maximum +0.3).

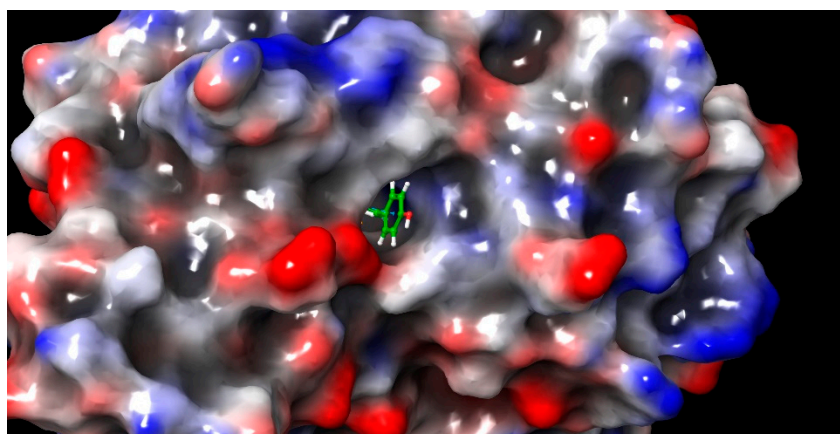

**Figure S5.** 2D pose of compound (4) in the active site of HDAC-2 and its interactions.

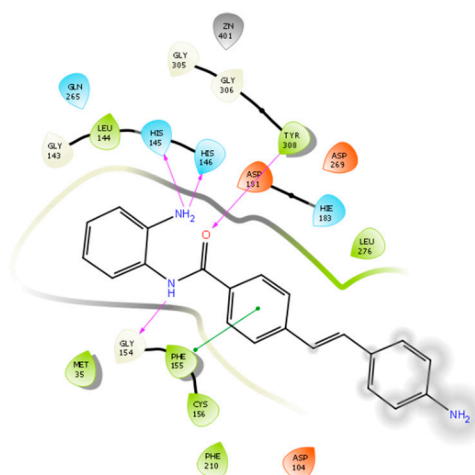

**Figure S6.** 2D pose of compound (**5**) in the active site of HDAC-2 and its interactions.

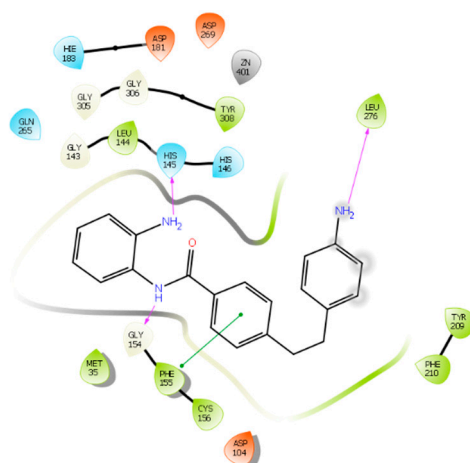

**Figure S7.** 2D pose of compound (**20**) in the active site of HDAC-2 and its interactions.

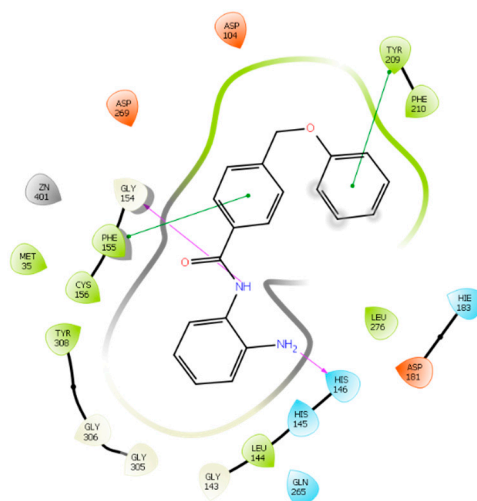

**Figure S8.** 2D pose of compound (**21**) in the active site of HDAC-2 and its interactions.

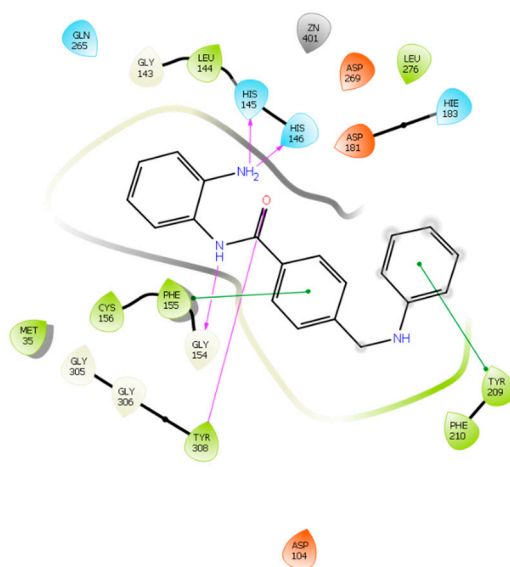

**Figure S9.** 2D pose of compound (**22**) in the active site of HDAC-2 and its interactions.

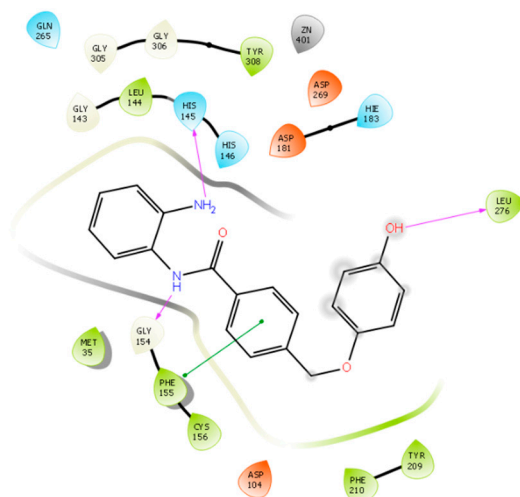

**Figure S10.** 2D pose of compound (**23**) in the active site of HDAC-2 and its interactions.

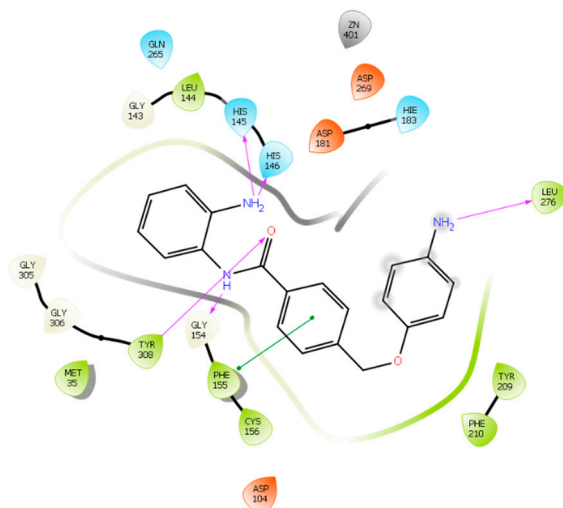

**Figure S11.** 2D pose of compound (**24**) in the active site of HDAC-2 and its interactions.

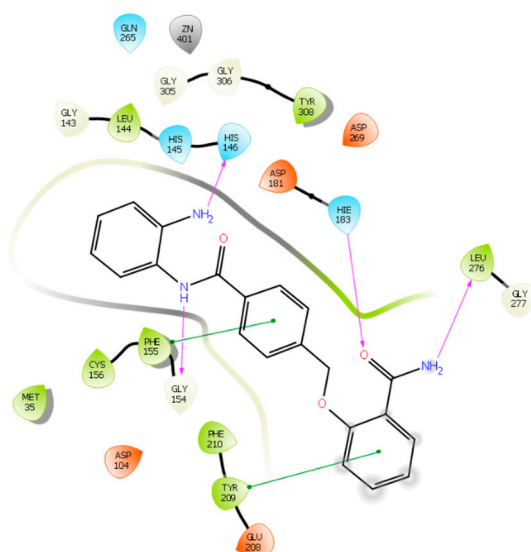

**Figure S12.** 2D pose of compound (**25**) in the active site of HDAC-2 and its interactions.

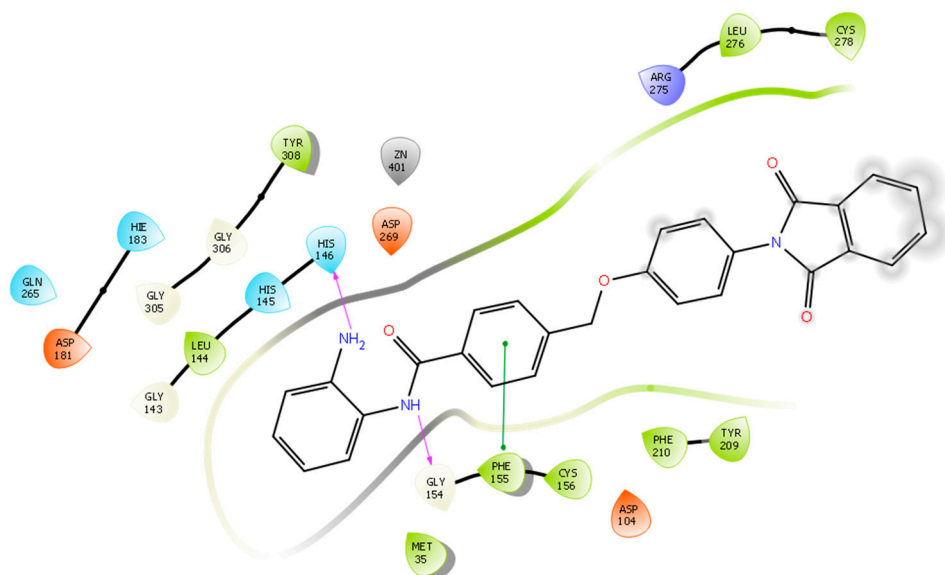

**Figure S13.** 2D pose of compound (**26**) in the active site of HDAC-2 and its interactions.

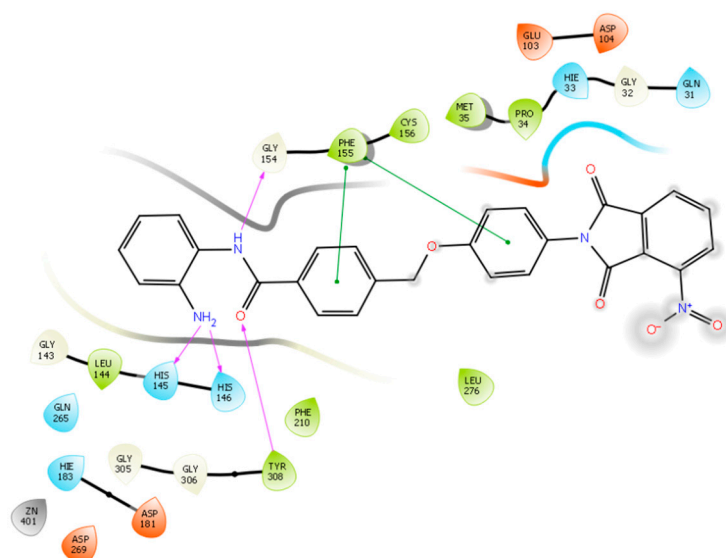

Table S1: Occurrence of hydrogen bonding between protein and ligand, during each replicate of HDAC-1-(**5**), HDAC-2-(**4**), and HDAC-2-(**5**) simulations (HDAC-2 numbering).

|                    | GLY 154 | HIS145 | HIS146 |
|--------------------|---------|--------|--------|
| <b>HDAC-1-(5)</b>  |         |        |        |
| <b>Replicate 1</b> | 0.4972  | 0.8610 | 0.4544 |
| <b>Replicate 2</b> | 0.4552  | 0.8884 | 0.4820 |
| <b>Replicate 3</b> | 0.3350  | 0.8210 | 0.5100 |
| <b>Replicate 4</b> | 0.5520  | 0.8632 | 0.5556 |
| <b>Replicate 5</b> | 0.6010  | 0.8552 | 0.5934 |
| <b>HDAC-2-(5)</b>  |         |        |        |
| <b>Replicate 1</b> | 0.4896  | 0.7750 | 0.5244 |
| <b>Replicate 2</b> | 0.5152  | 0.7898 | 0.4584 |
| <b>Replicate 3</b> | 0.5620  | 0.8046 | 0.4426 |
| <b>Replicate 4</b> | 0.4116  | 0.8176 | 0.4358 |
| <b>Replicate 5</b> | 0.5122  | 0.8052 | 0.5332 |
| <b>HDAC2-(4)</b>   |         |        |        |
| <b>Replicate 1</b> | 0.4994  | 0.7882 | 0.5008 |
| <b>Replicate 2</b> | 0.4170  | 0.8168 | 0.5214 |
| <b>Replicate 3</b> | 0.4364  | 0.7790 | 0.5044 |
| <b>Replicate 4</b> | 0.4902  | 0.7562 | 0.4904 |
| <b>Replicate 5</b> | 0.4442  | 0.7878 | 0.4752 |



Figure S14: RMSD of protein for each replicate of HDAC-1-(5) simulation.

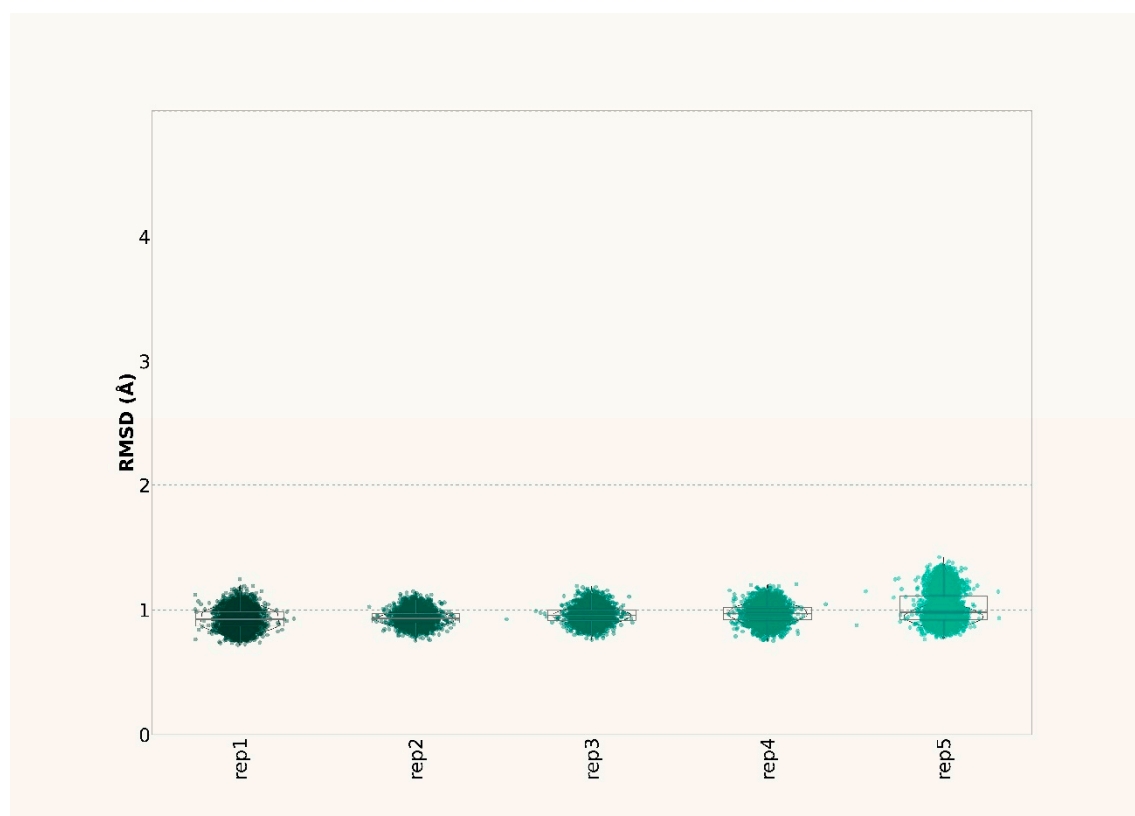

Figure S15: RMSD of protein for each replicate of HDAC-2-(**4**) simulation.

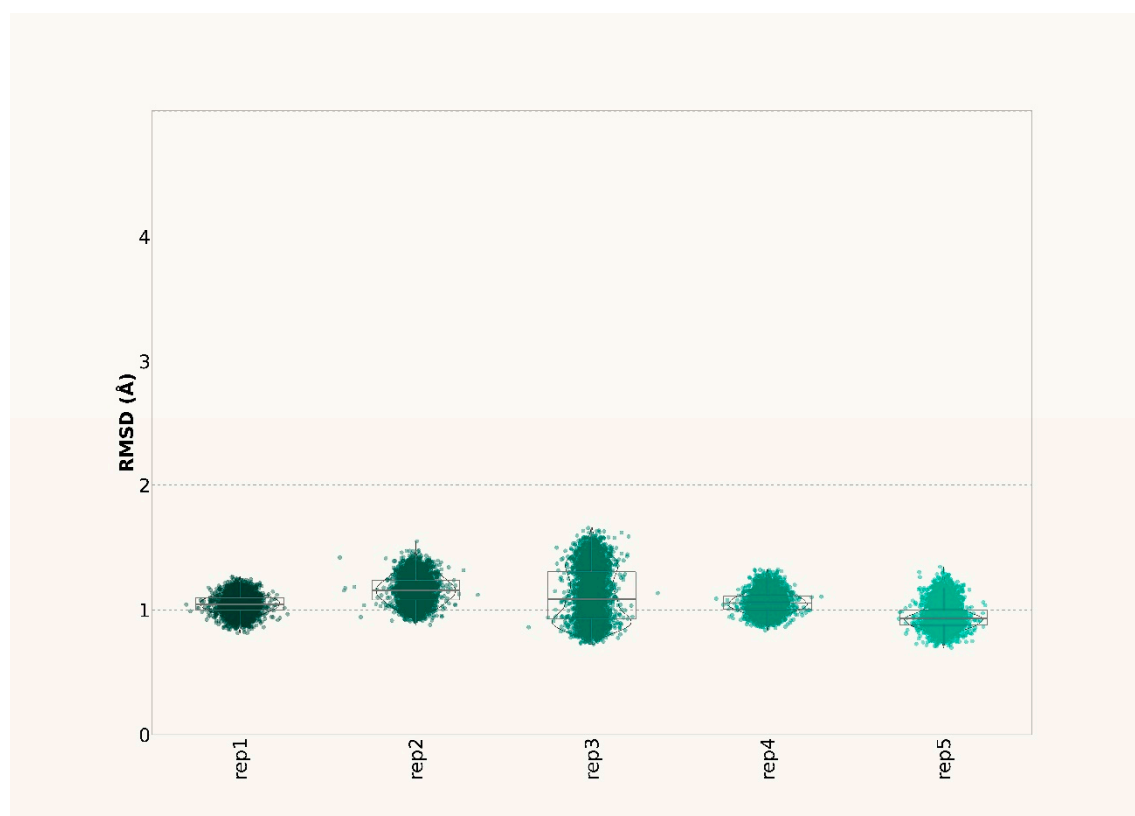

Figure S16: RMSD of protein for each replicate of HDAC-2-(5) simulation.

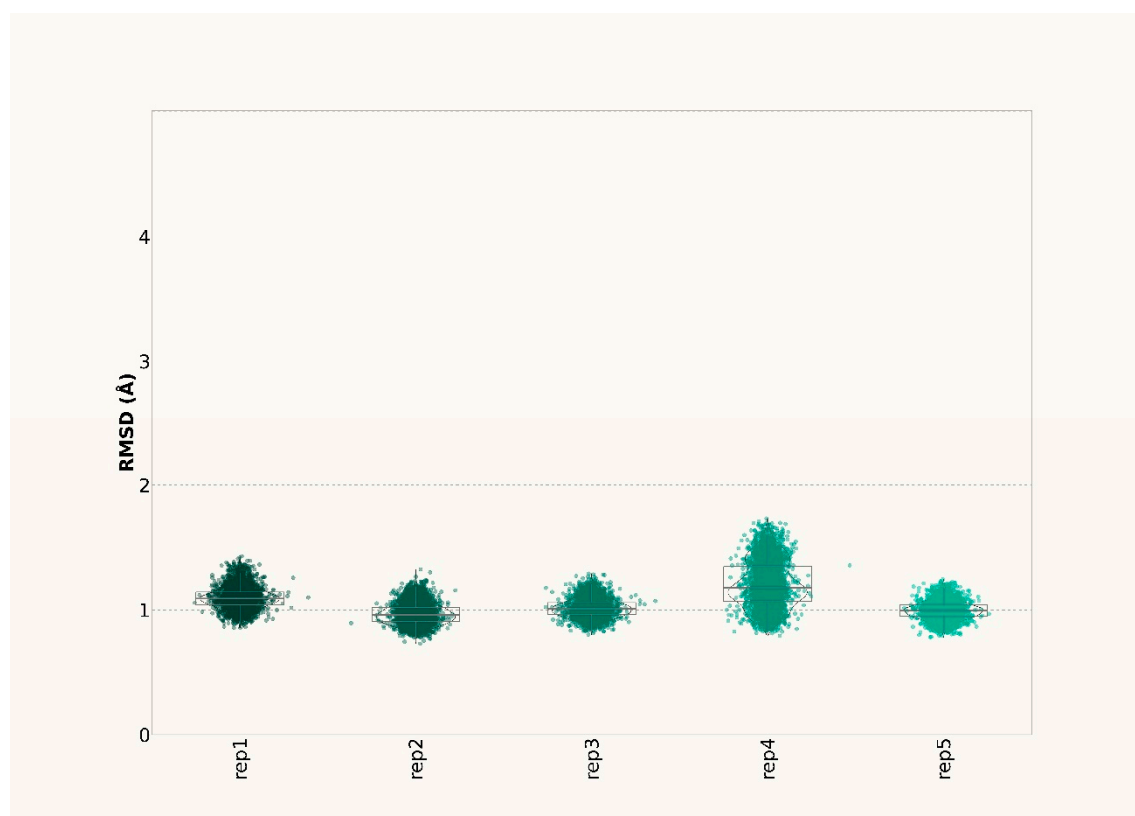

Figure S17: RMSD of heavy atoms of compound (**4**) during each replicate of HDAC-2-(**4**) simulation, compared with docking pose.

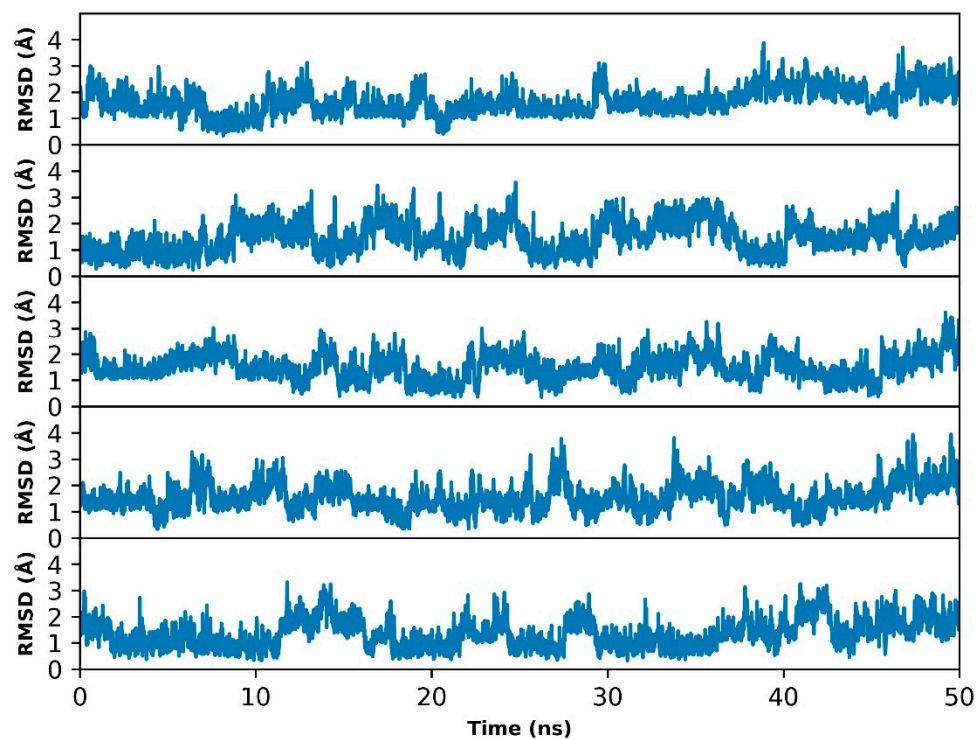

Figure S18: RMSD of heavy atoms of compound (**5**) during each replicate of HDAC-1-(**5**) simulation, compared with docking pose.

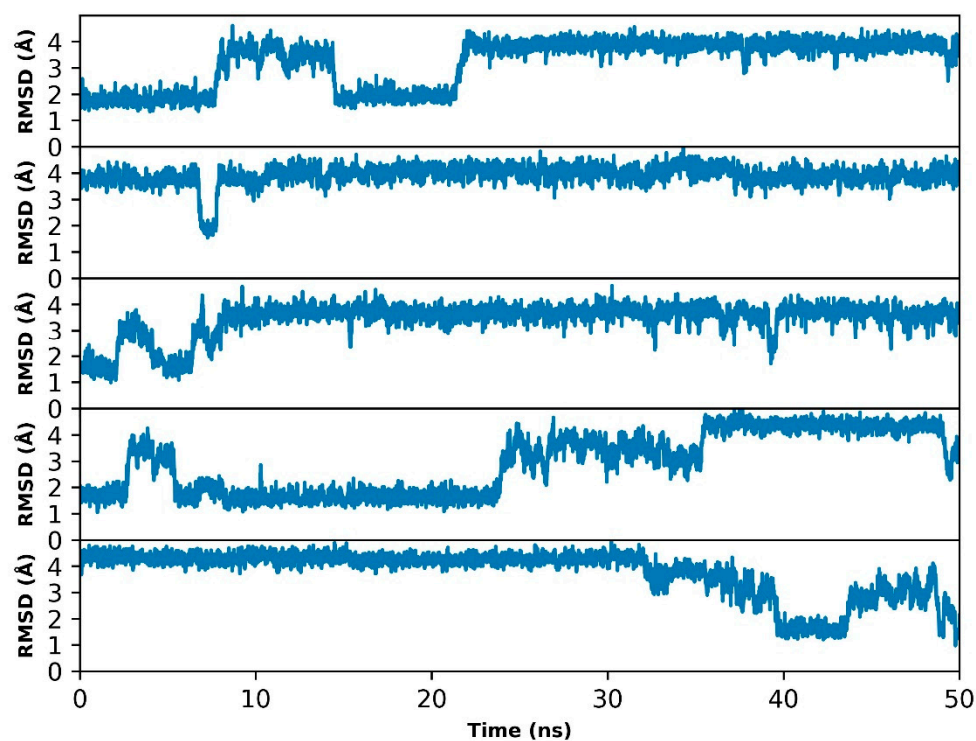

Figure S19: RMSD of heavy atoms of compound (**5**) during each replicate of HDAC-2-(**5**) simulation, compared with docking pose.

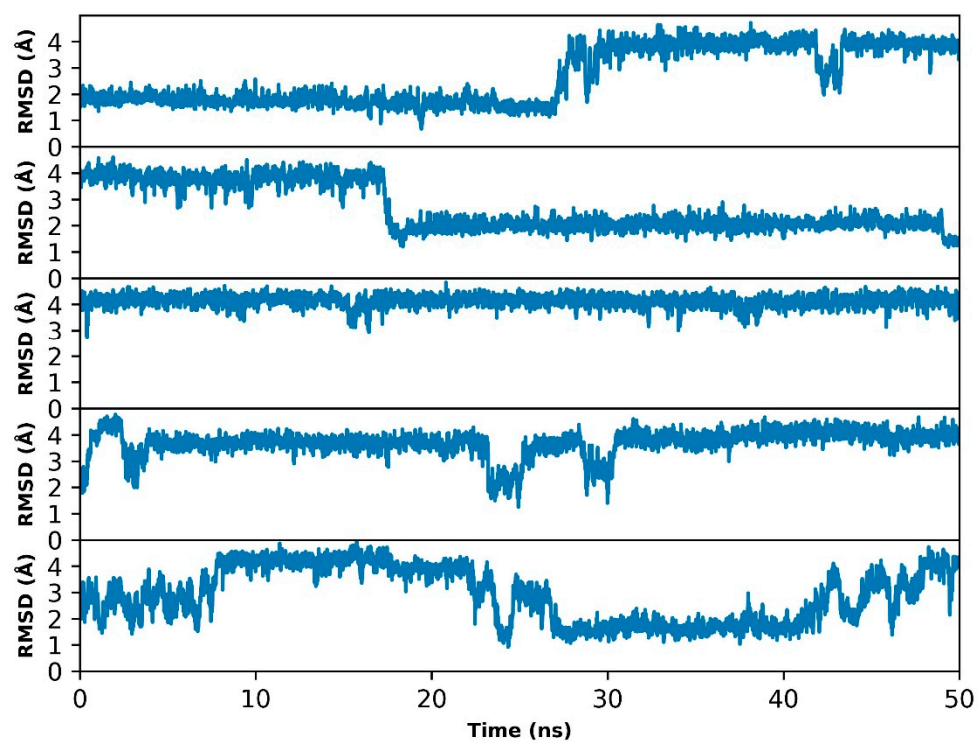

Figure S20: Distance between center of mass of 4-aminophenyl ring to the hydrogen atom of PHE155 for each replicate of HDAC-1-(5) simulation.

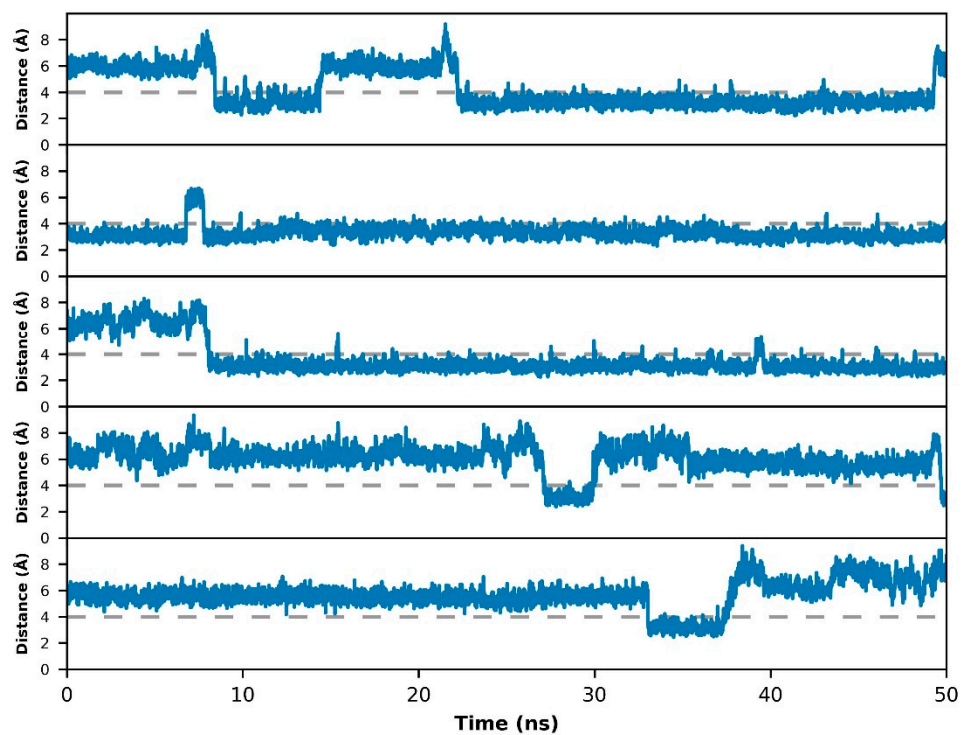

Figure S21: Distance between center of mass of 4-aminophenyl ring to the hydrogen atom of PHE155 for each replicate of HDAC-2-(5) simulation.

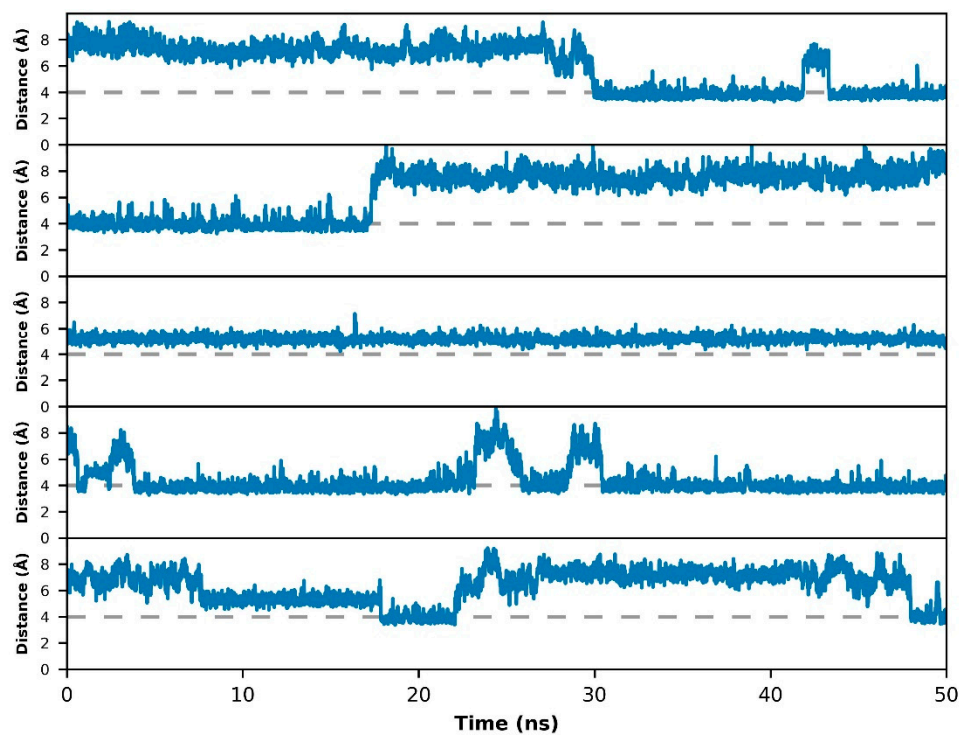



Figure S22:  $^1\text{H}$  NMR spectra of compound (**4**) (600MHz,  $\text{DMSO-d}_6$ ).

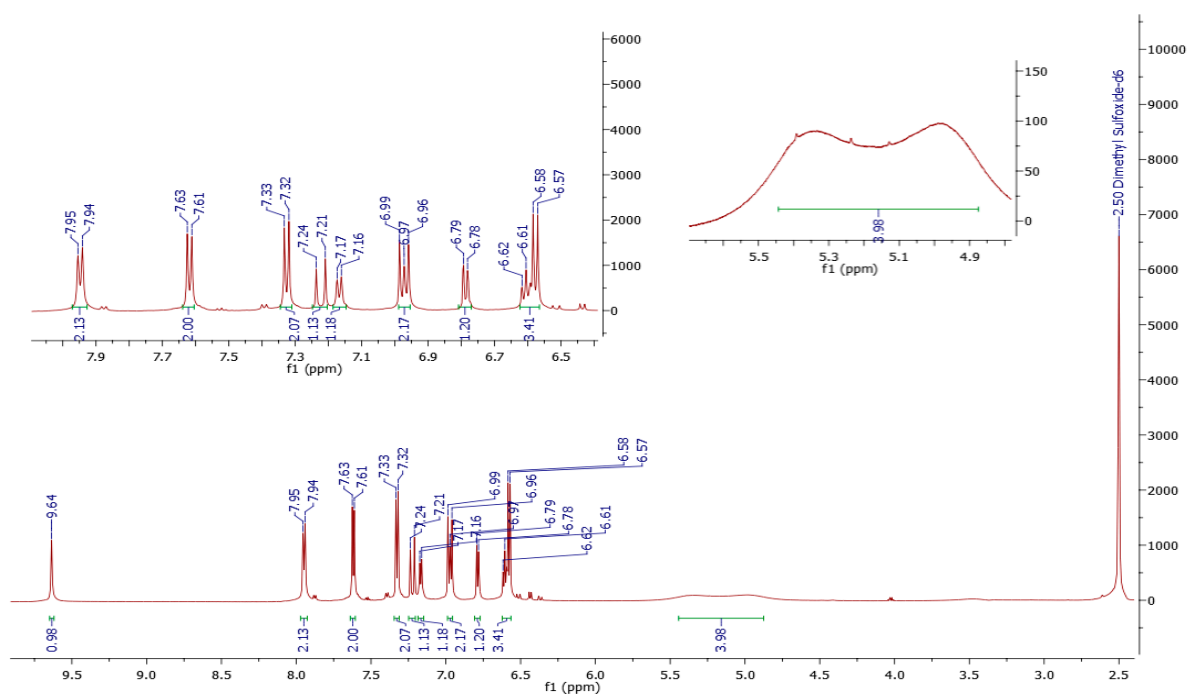

Figure S23:  $^{13}\text{C}$  NMR spectra of compound (**4**) (150MHz,  $\text{DMSO-d}_6$ ).

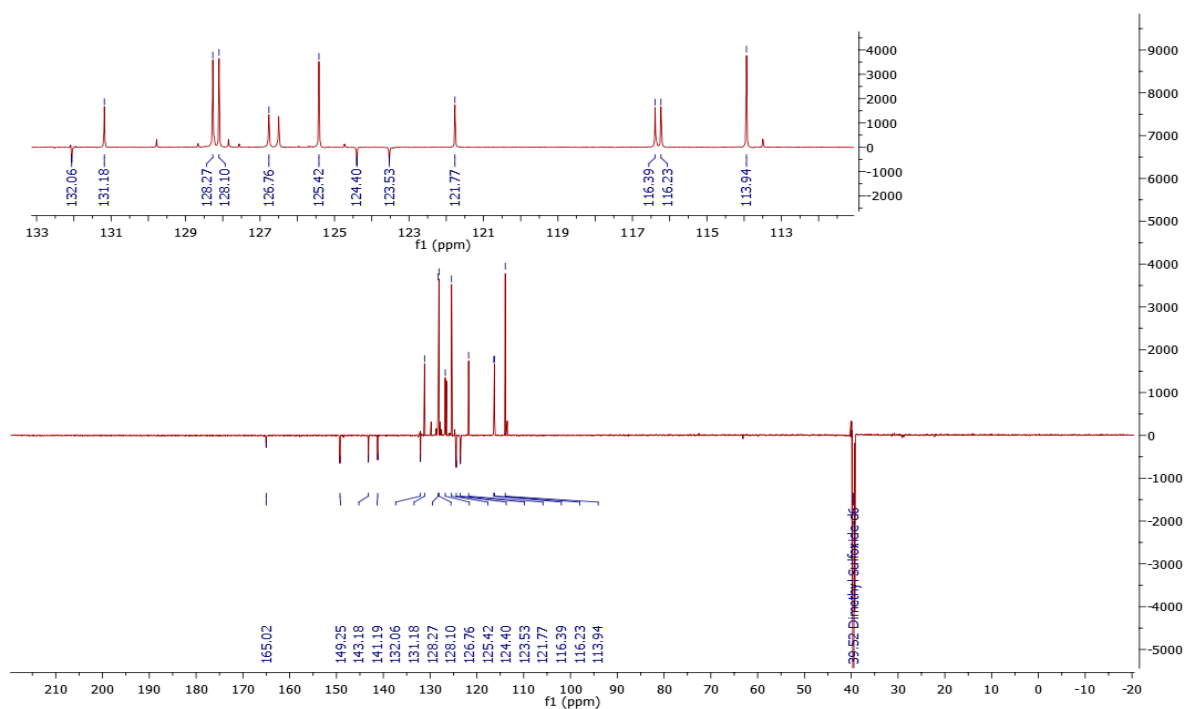

Figure S24:  $^1\text{H}$  NMR spectra of compound (**5**) (600MHz,  $\text{DMSO-d}_6$ ).

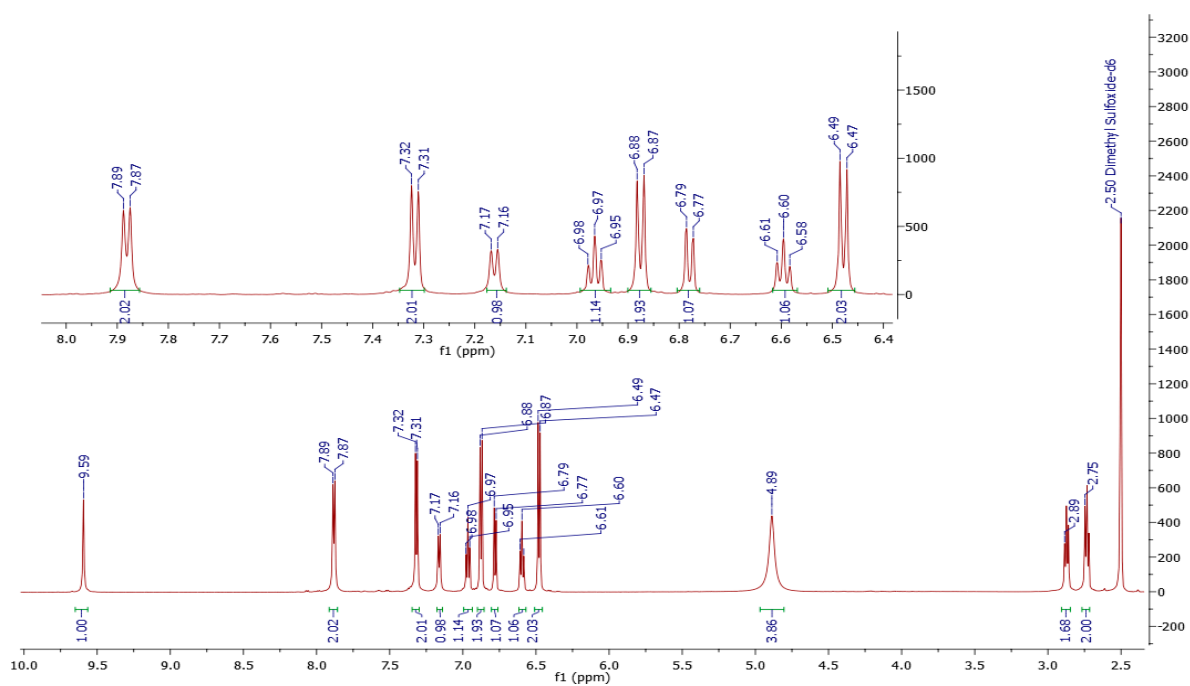

Figure S25:  $^{13}\text{C}$  NMR spectra of compound (**5**) (150MHz,  $\text{DMSO-d}_6$ ).

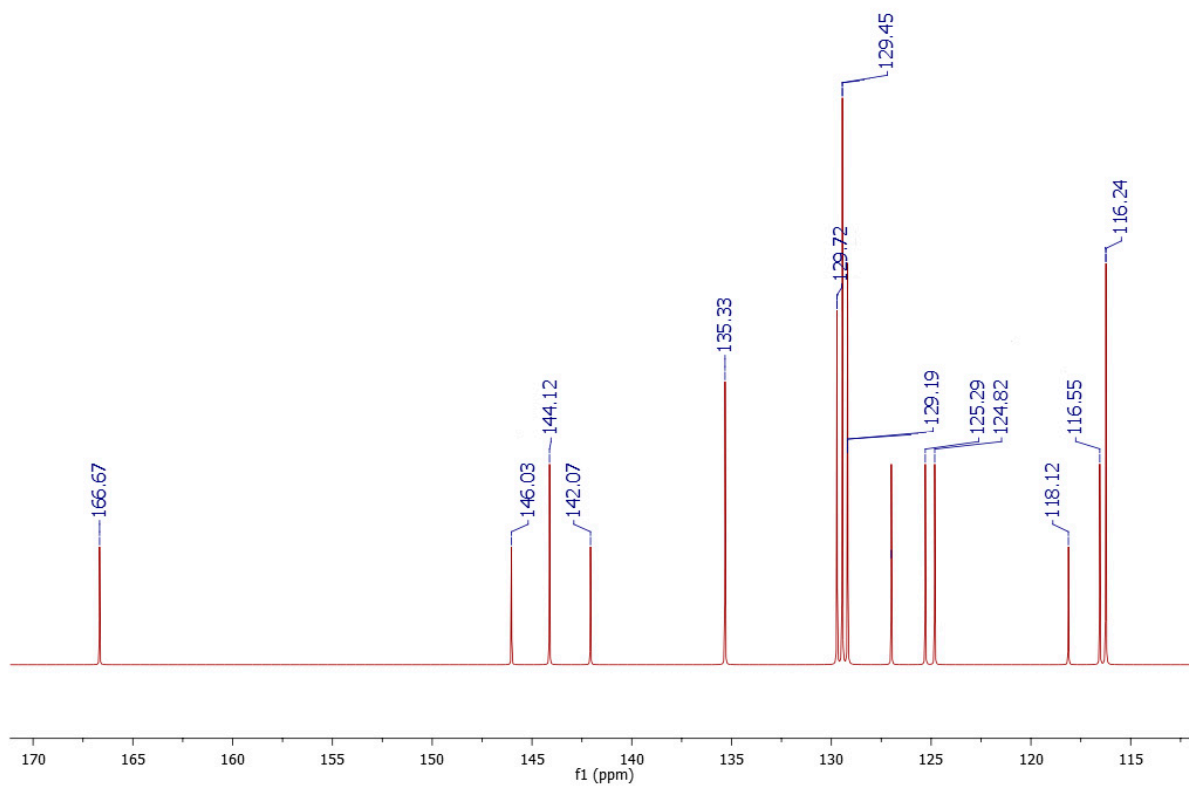

Figure S26:  $^1\text{H}$  NMR spectra of compound (**7**) (600MHz,  $(\text{CD}_3)_2\text{CO}$ ).

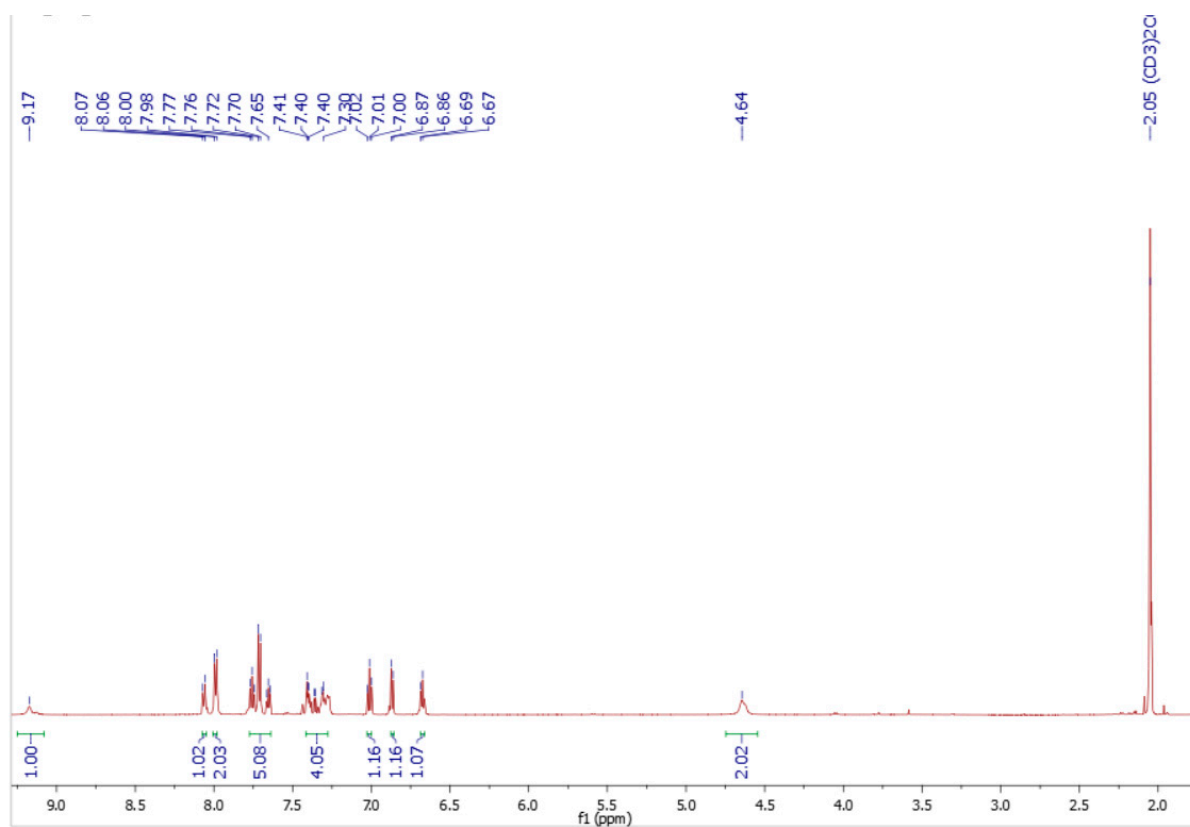

Figure S27:  $^{13}\text{C}$  NMR spectra of compound (**7**) (150MHz,  $(\text{CD}_3)_2\text{CO}$ ).

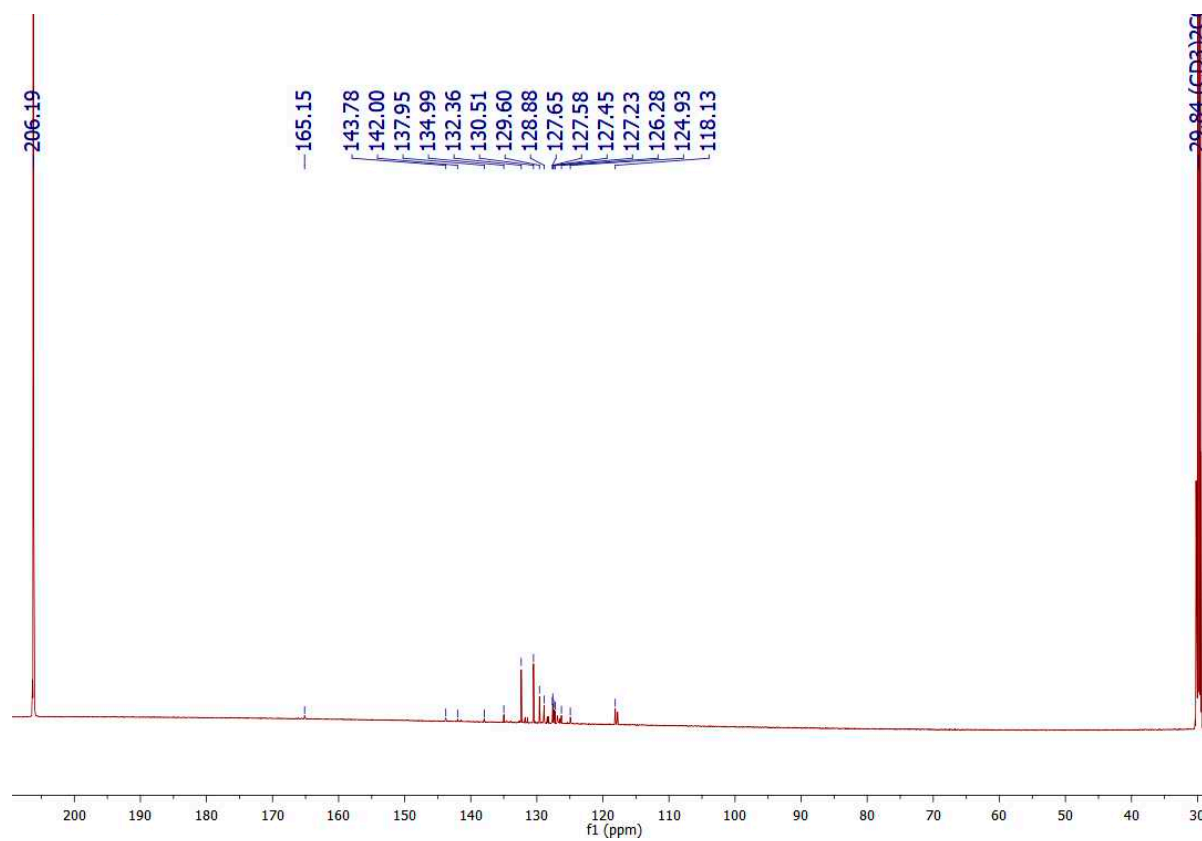

Figure S28:  $^1\text{H}$  NMR spectra of compound (**20**) (600MHz, DMSO-d<sub>6</sub>).

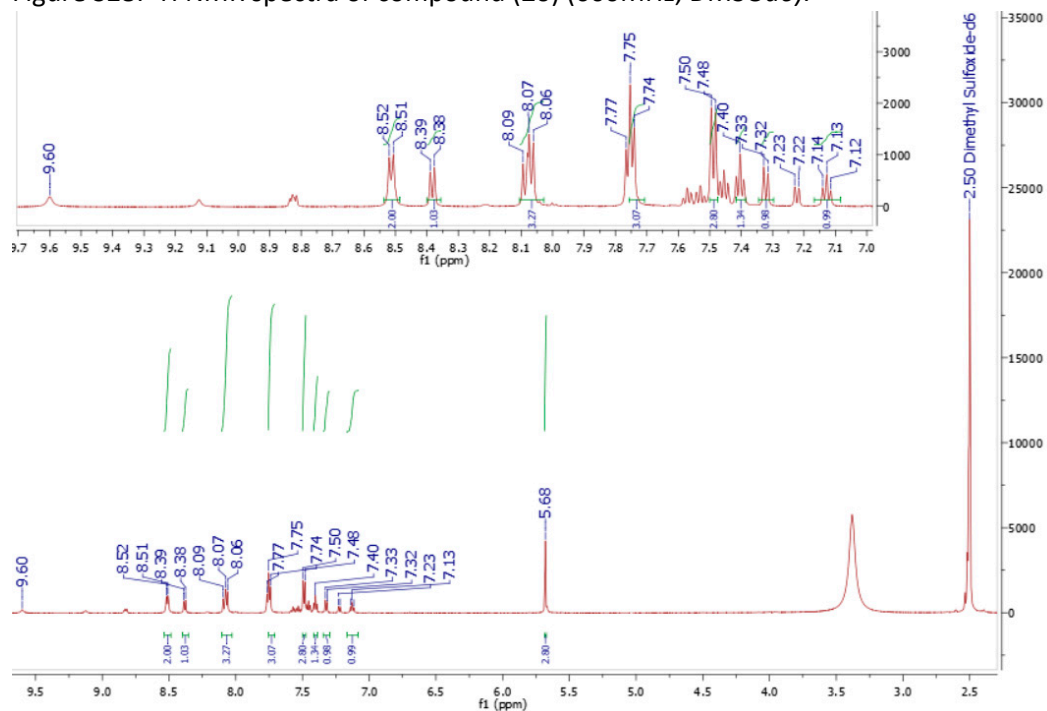

Figure S29:  $^{13}\text{C}$  NMR spectra of compound (**20**) (150MHz, DMSO-d<sub>6</sub>).

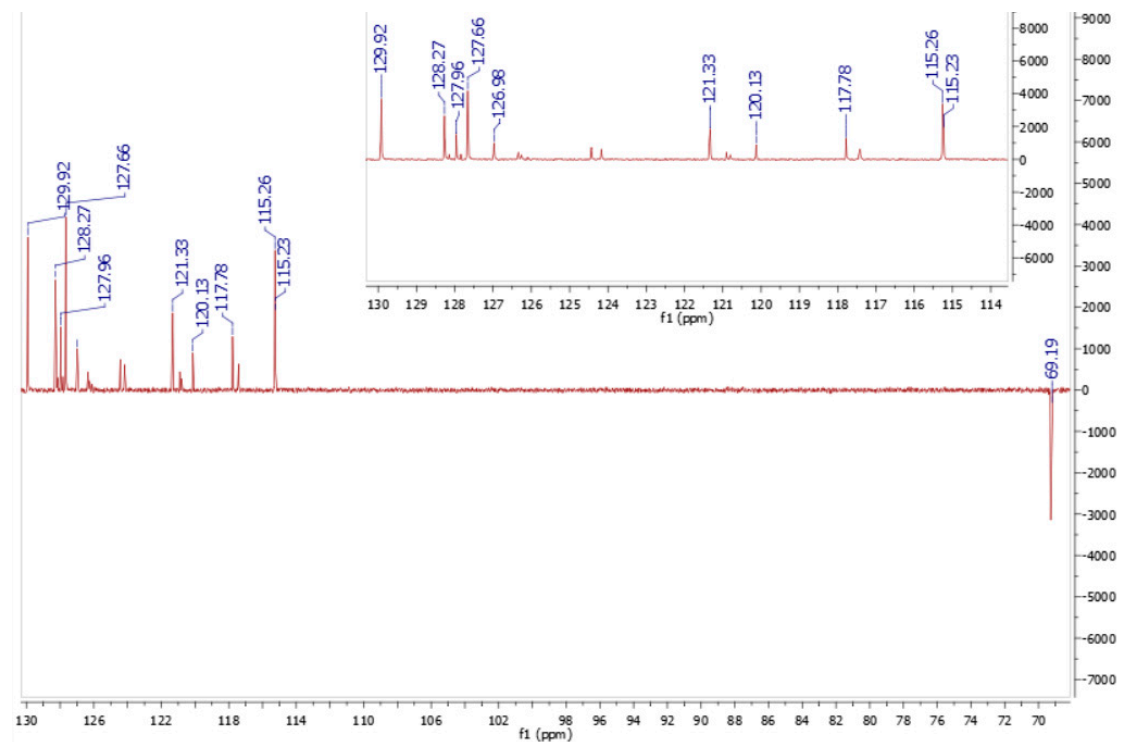

Figure S30:  $^1\text{H}$  NMR spectra of compound (**21**) (600MHz, DMSO- $d_6$ ).

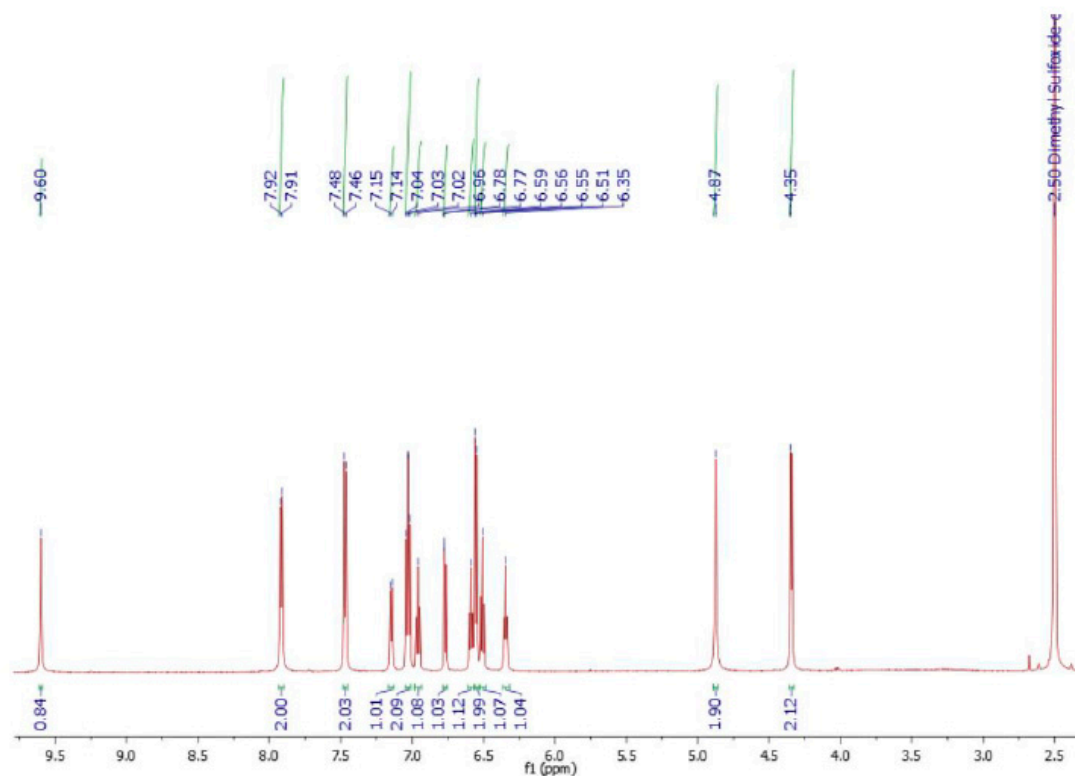

Figure S31:  $^{13}\text{C}$  NMR spectra of compound (**21**) (150MHz, DMSO- $d_6$ ).

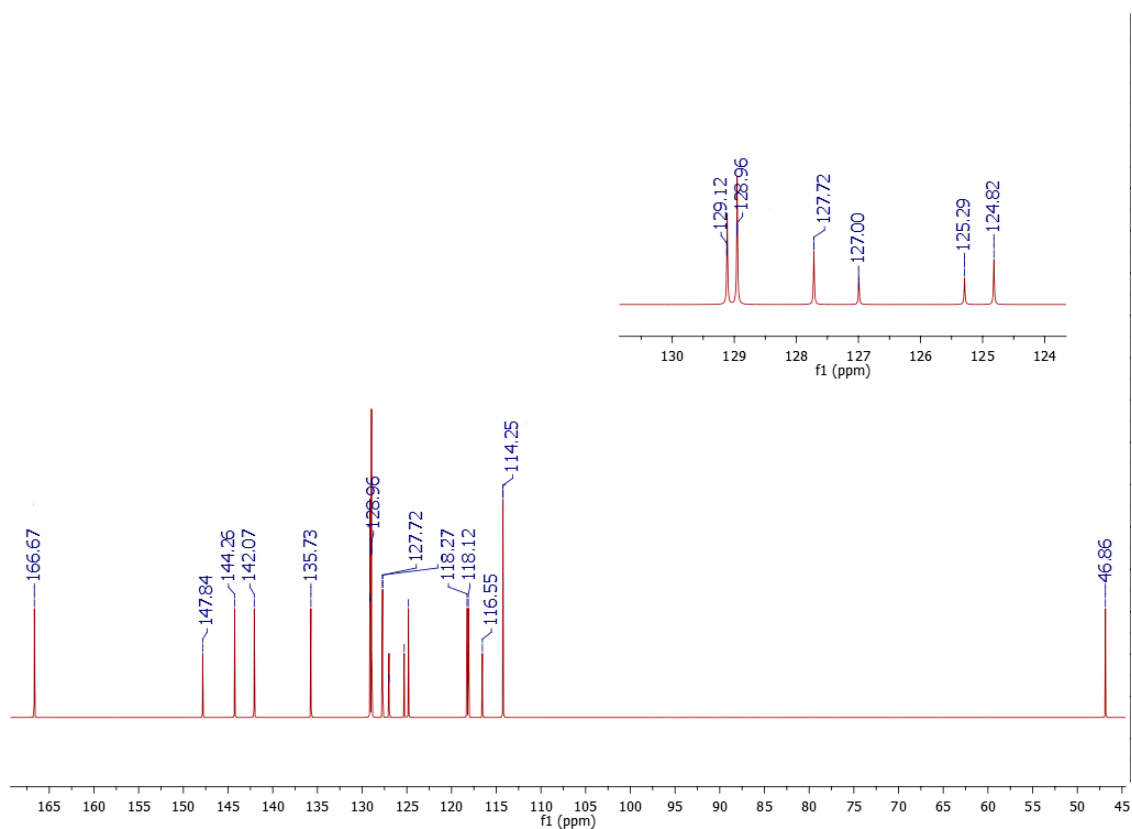

Figure S32:  $^1\text{H}$  NMR spectra of compound (**22**) (600MHz, DMSO- $d_6$ ).

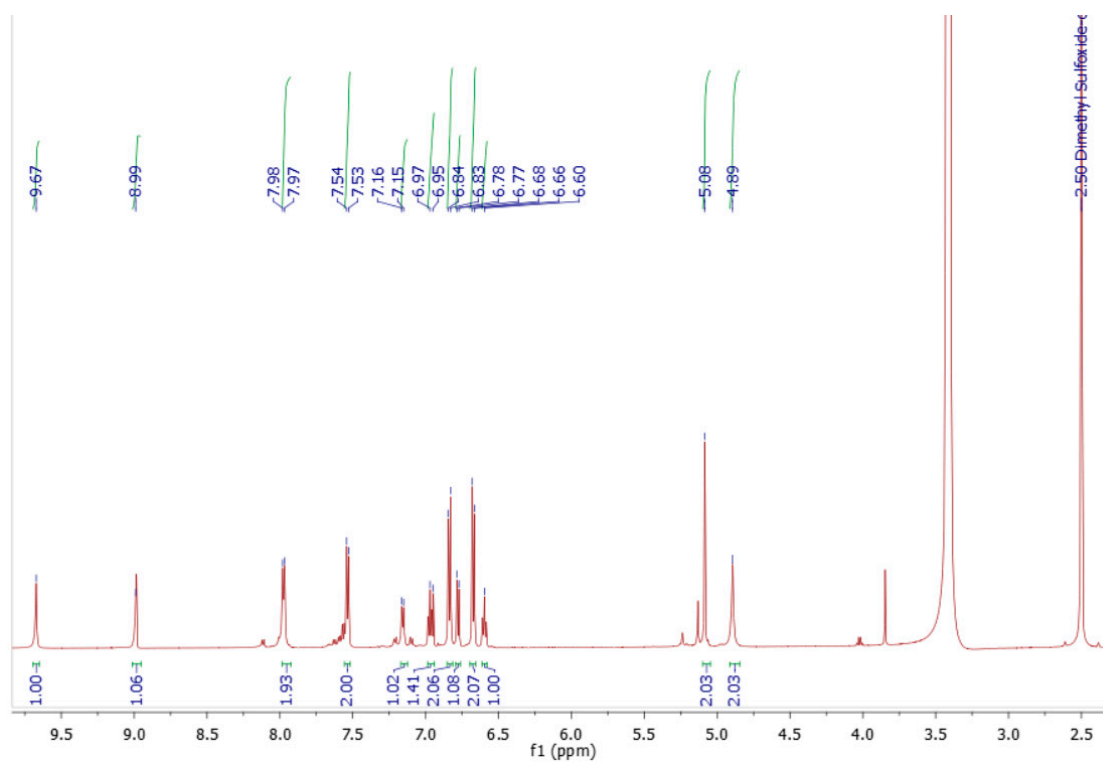

Figure S33:  $^{13}\text{C}$  NMR spectra of compound (**22**) (150MHz, DMSO- $d_6$ ).

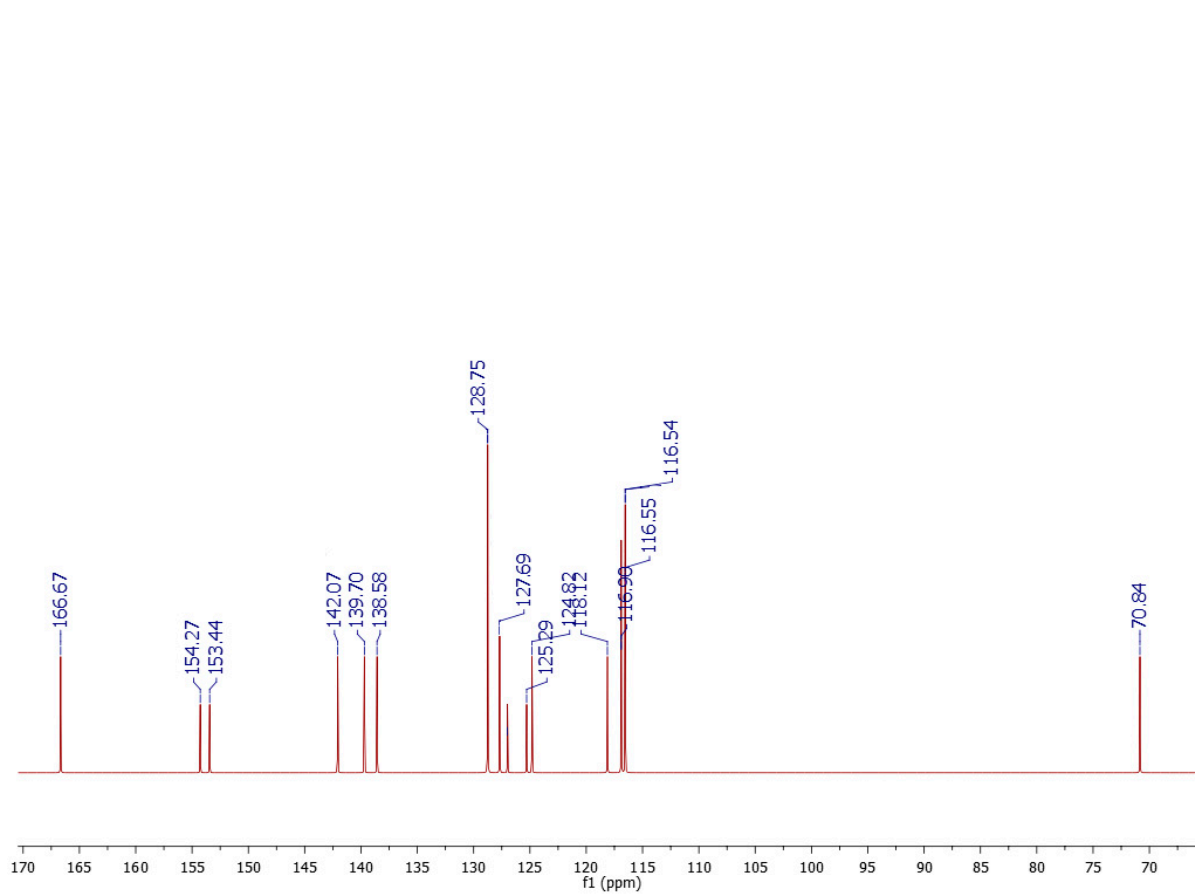

Figure S34:  $^1\text{H}$  NMR spectra of compound (**23**) (600MHz, DMSO-d<sub>6</sub>).

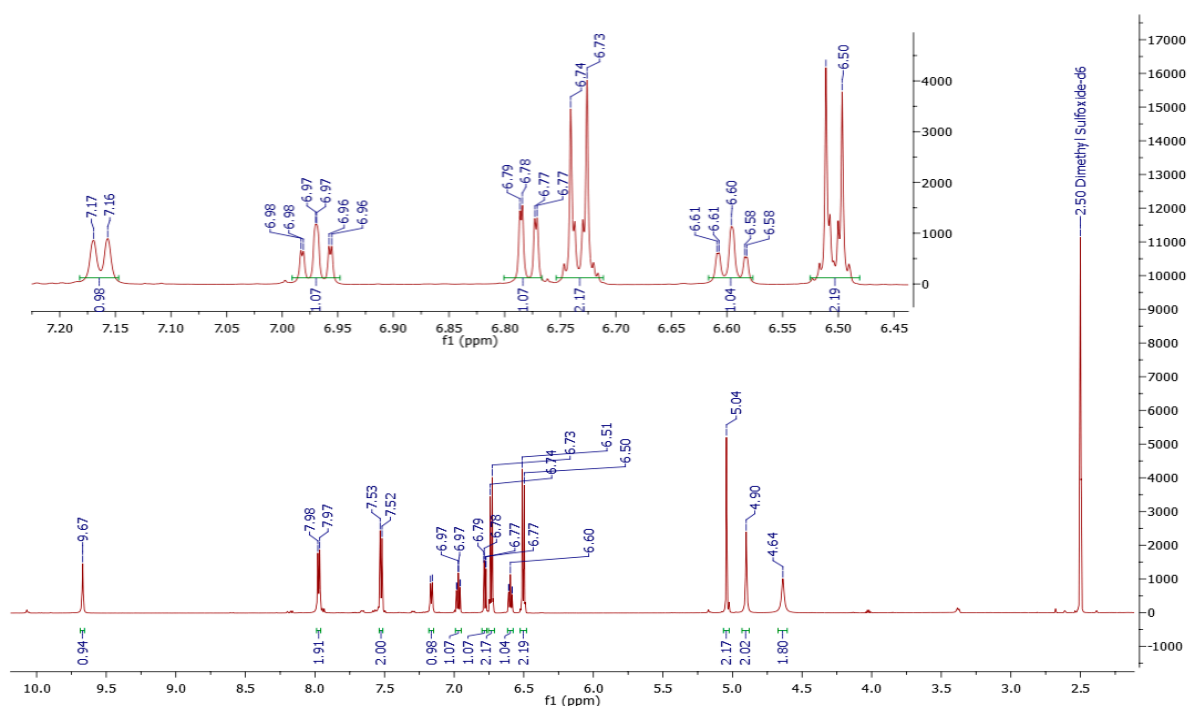

Figure S35:  $^{13}\text{C}$  NMR spectra of compound (**23**) (150MHz, DMSO-d<sub>6</sub>).

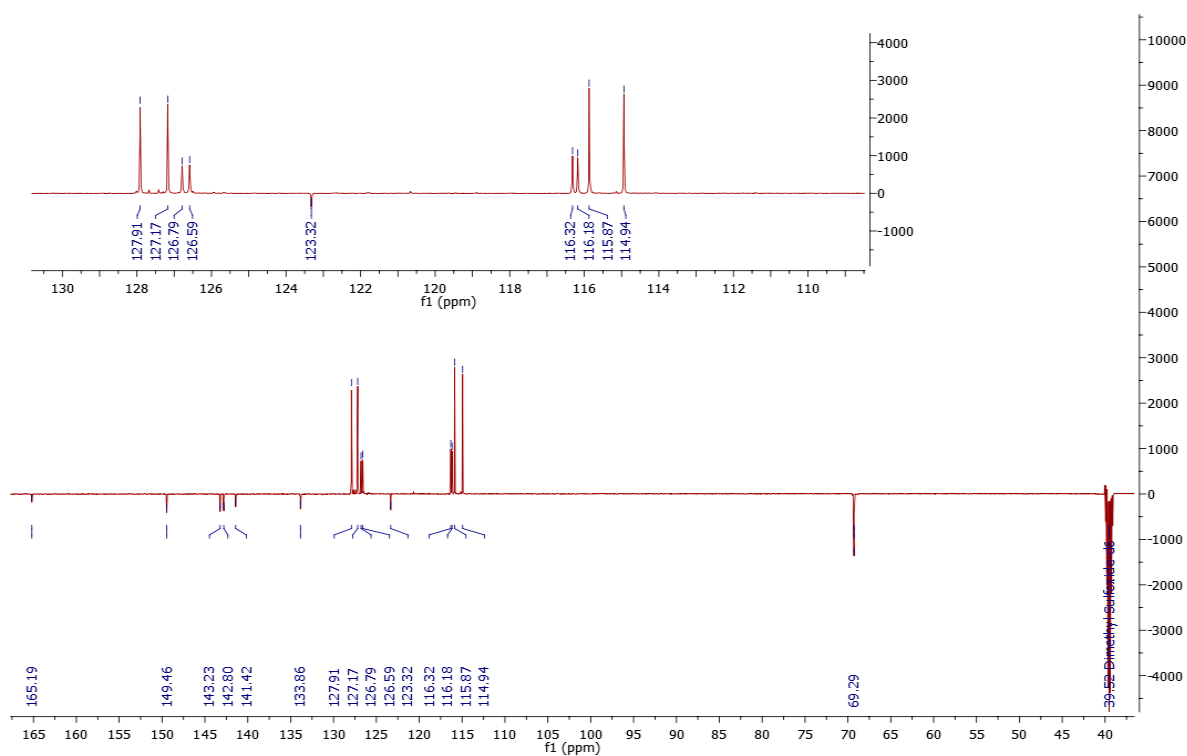

Figure S36:  $^1\text{H}$  NMR spectra of compound (**24**) (300MHz, DMSO- $d_6$ ).

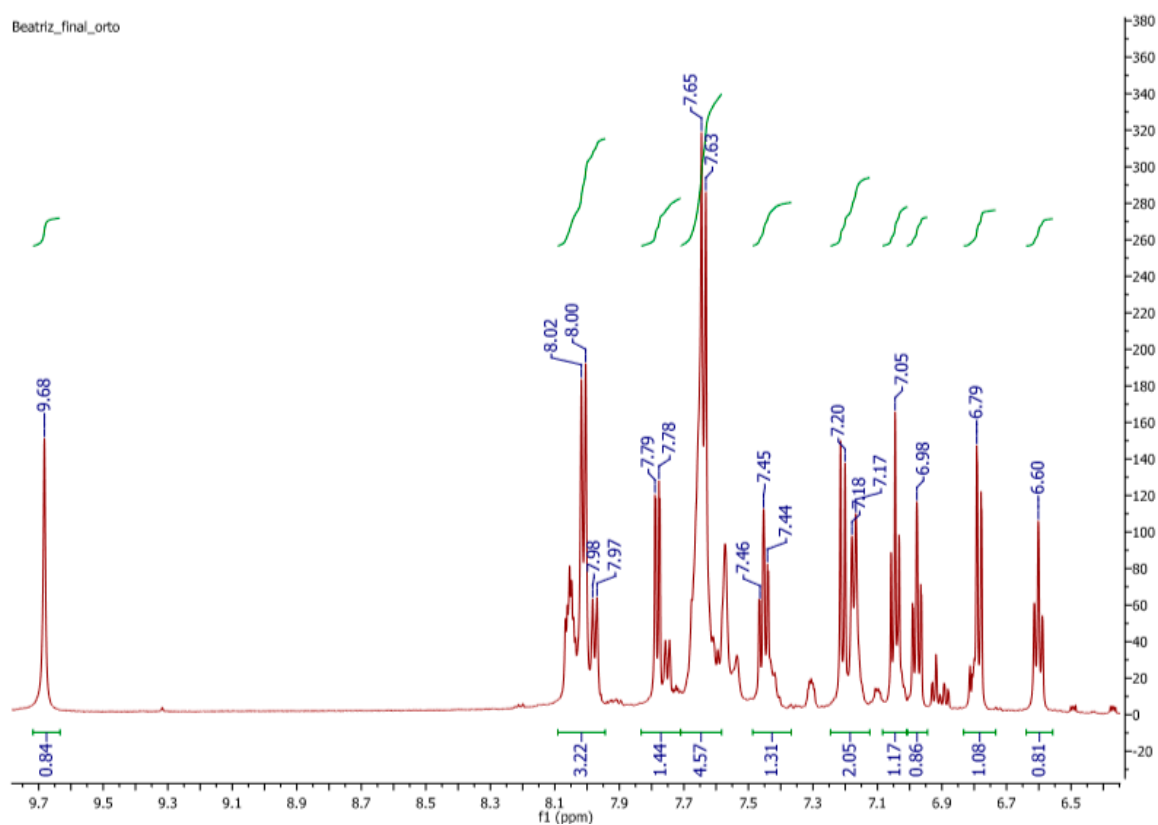

Figure S37:  $^{13}\text{C}$  NMR spectra of compound (**24**) (75MHz, DMSO- $d_6$ ).

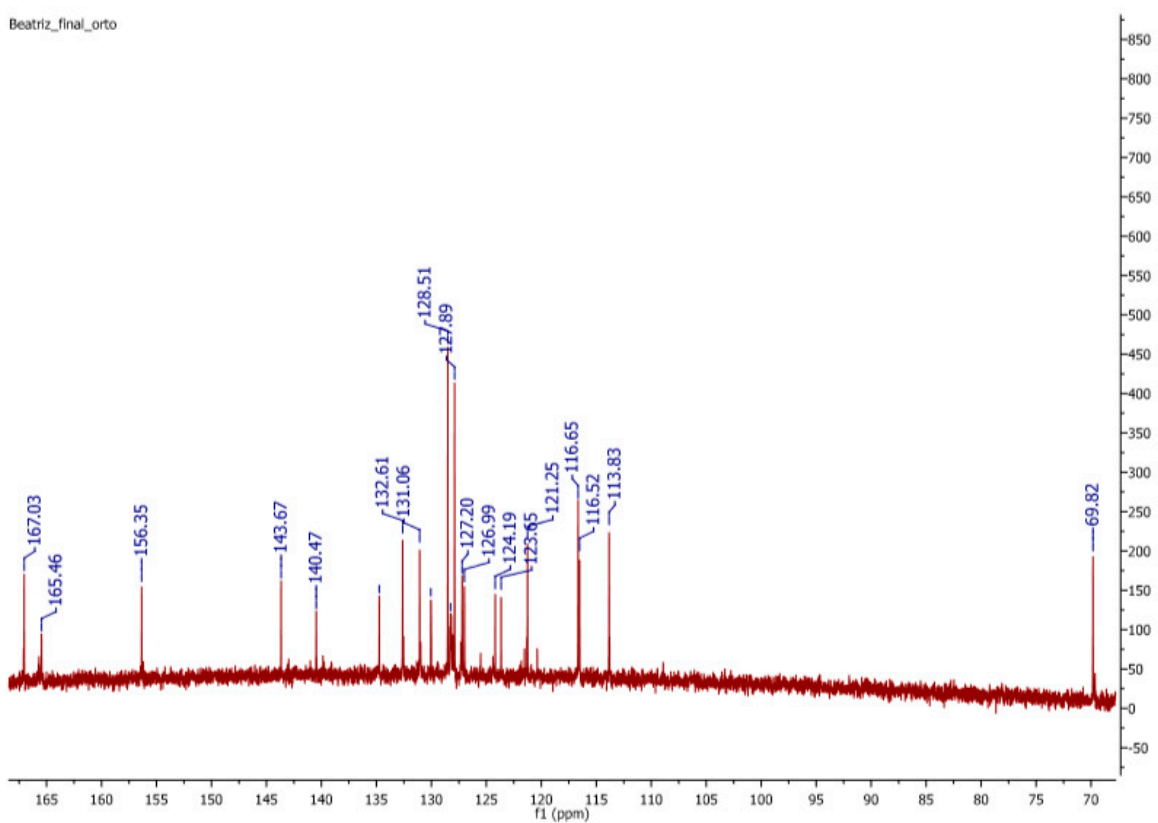



Figure S38:  $^1\text{H}$  NMR spectra of compound (**25**) (600MHz,  $\text{DMSO-d}_6$ ).

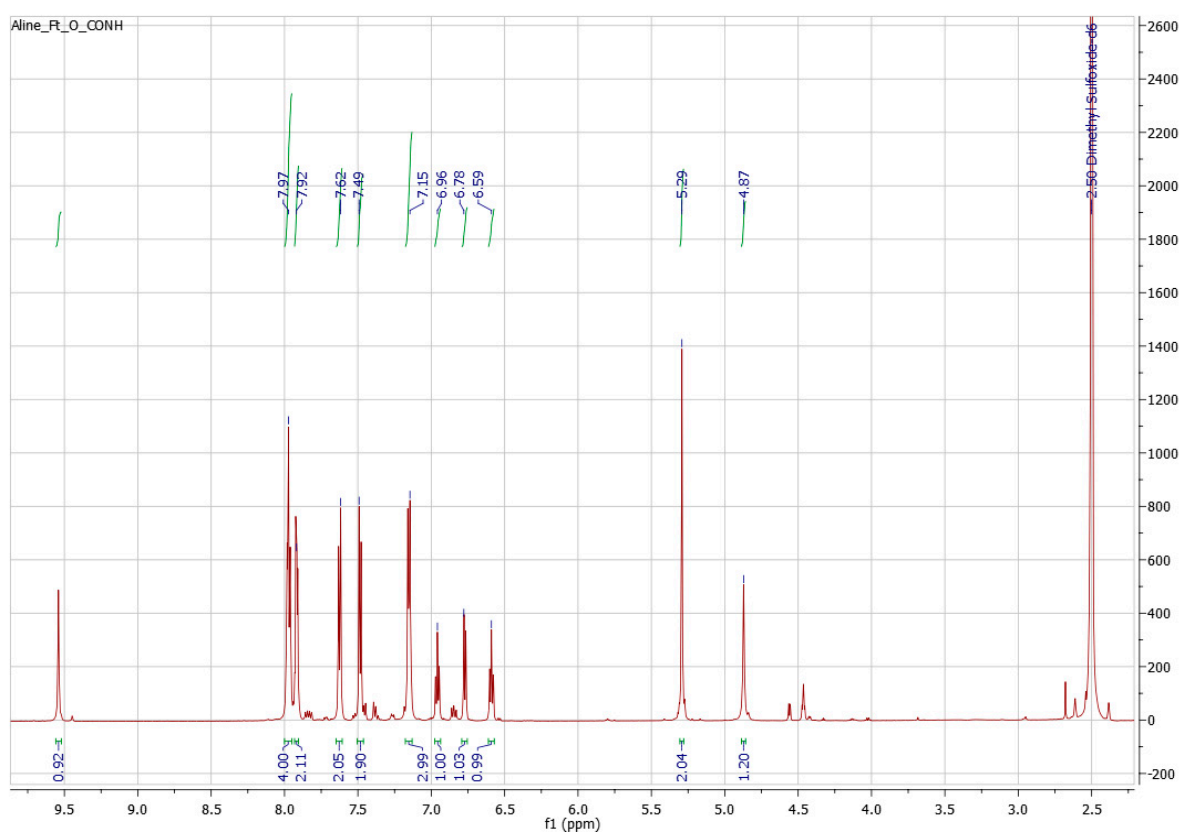

Figure S39:  $^{13}\text{C}$  NMR spectra of compound (**25**) (150MHz,  $\text{DMSO-d}_6$ ).

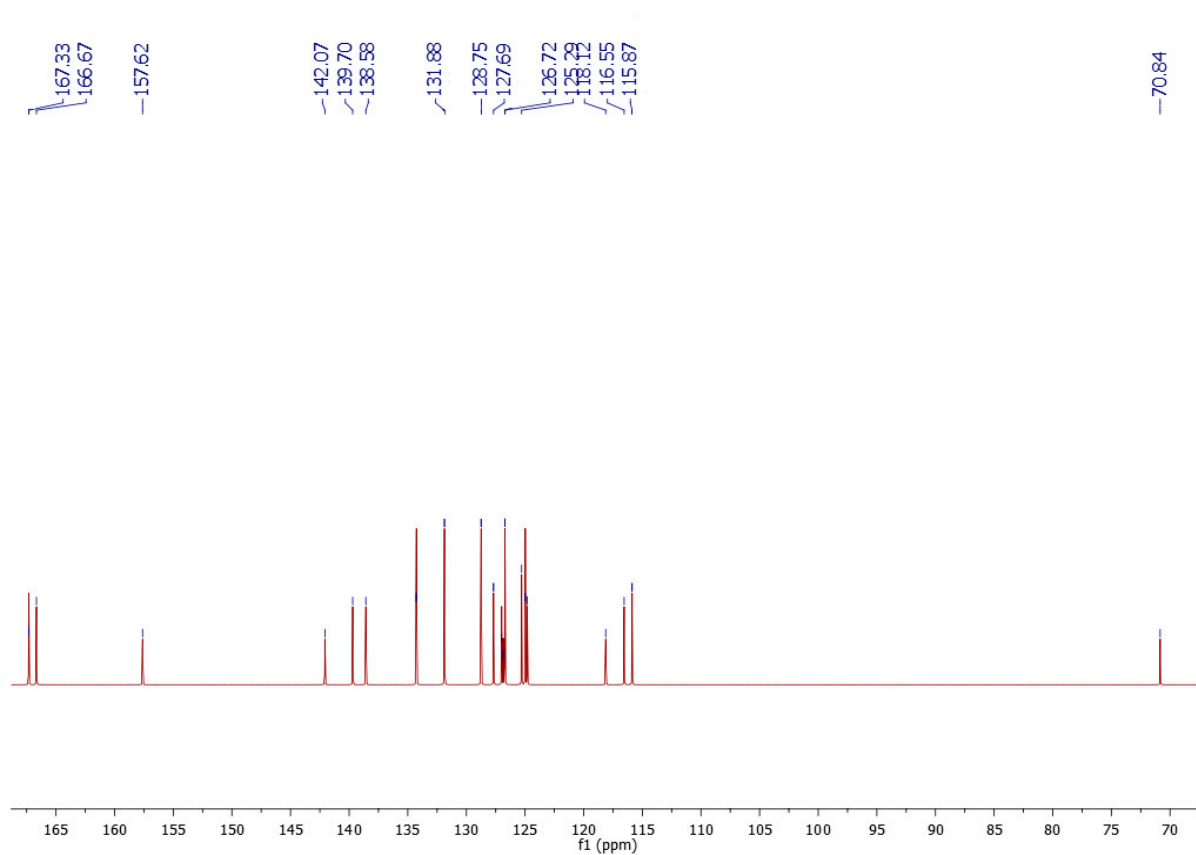

Figure S40:  $^1\text{H}$  NMR spectra of compound (**26**) (600MHz,  $\text{DMSO-}d_6$ ).

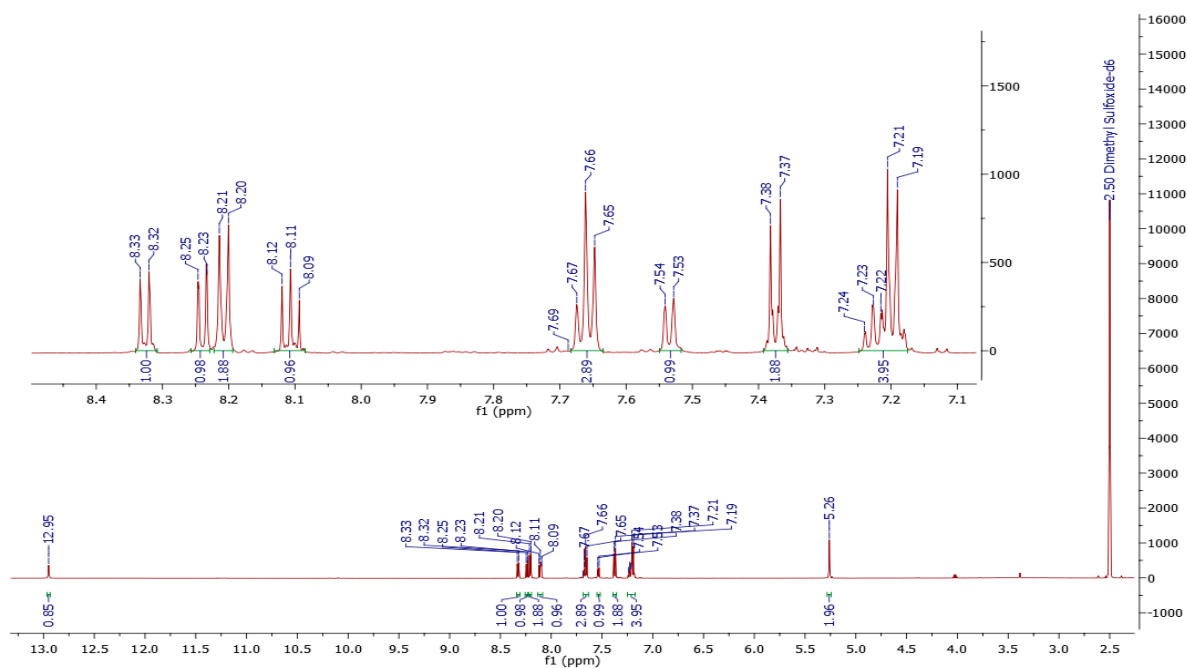

Figure S41:  $^{13}\text{C}$  NMR spectra of compound (**26**) (150MHz,  $\text{DMSO-}d_6$ ).

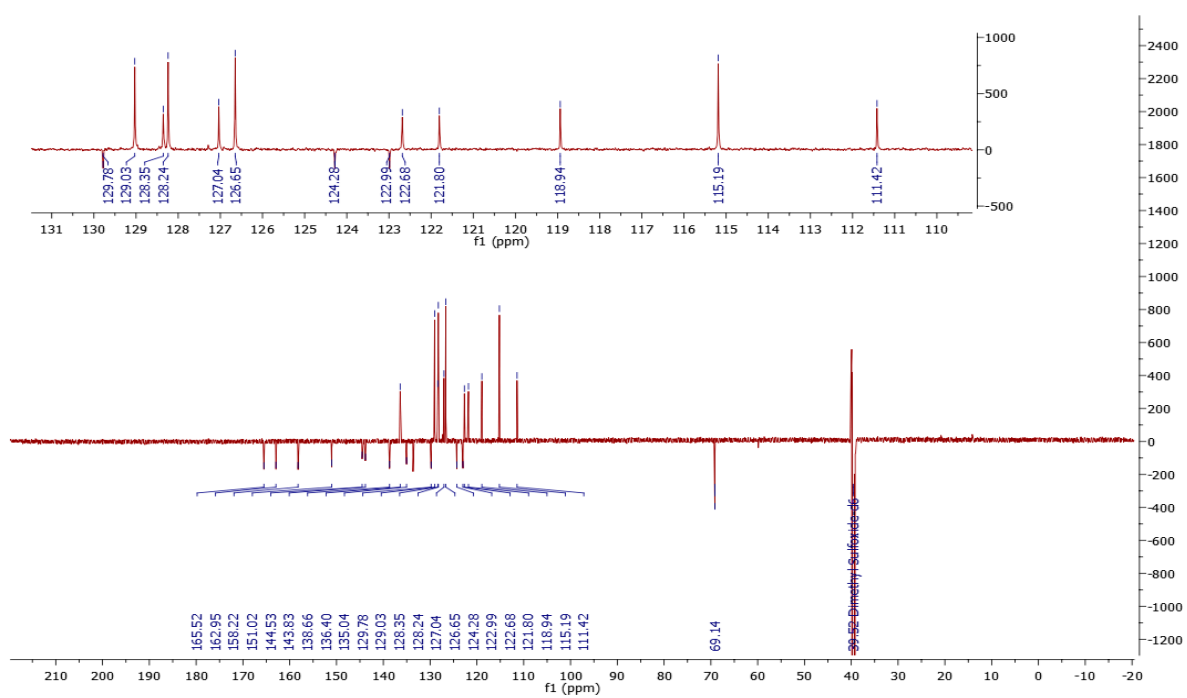

Supplement: s1 [file s1]
